# Supplementary material for: Synthesis and structure of two tetranuclear osmium carbonyl isotopomers: a crystallographic isotope effect
Source: Royal Society of Chemistry journal article supplement (doi:10.1039/b711872d), 2008-01-01
Supplement: b711872d.pdf [file b711872d.pdf]

Supplementary data (ESI) for *Dalton Transactions*  
This journal is © The Royal Society of Chemistry 2008

### Supplementary Data

To accompany, “Synthesis and structure of two tetranuclear osmium carbonyl isotopomers: A crystallographic isotope effect.” by John P. Canal,<sup>\*,a</sup> Michael Jennings,<sup>b</sup> Glenn P. A. Yap,<sup>c</sup> and Roland K. Pomeroy<sup>a</sup>

<sup>a</sup>Department of Chemistry, Simon Fraser University, Burnaby, British Columbia V5A 1S6,  
Canada.

<sup>b</sup>Department of Chemistry, University of Western Ontario, London, Ontario N6A 5B8,  
Canada,

<sup>c</sup>Department of Chemistry and Biochemistry, University of Delaware, Newark, DE 19716,  
USA.

\*Corresponding author. E-mail: [jcanal@sfu.ca](mailto:jcanal@sfu.ca)

### Captions

**Figure S1.** (a) IR (KBr) spectrum of  $[\text{Os}_4(\mu\text{-H})(\mu\text{-OH})(\mu\text{-CO})(\text{CO})_{12}\cdot\text{H}_2\text{O}]$  (**1·H<sub>2</sub>O**) (\* stretches due to CO<sub>2</sub>). (b) IR (hexanes) spectrum ( $\nu(\text{CO})$  region) of **1·H<sub>2</sub>O**.

**Figure S2.** <sup>1</sup>H NMR spectra of (A)  $\text{Os}_4(\mu\text{-H})(\mu\text{-OD})(\mu\text{-CO})(\text{CO})_{12}$  (**2**) and (B) **1·H<sub>2</sub>O**.

**Table S1.** Summary of Crystal Data and Details of Intensity Collection for  
 $[\text{Os}_4(\mu\text{-H})(\mu\text{-OH})(\mu\text{-CO})(\text{CO})_{12}\cdot\text{H}_2\text{O}]$  (**1·H<sub>2</sub>O**)

**Table S2.** Atomic Coordinates for **1·H<sub>2</sub>O**

**Table S3.** Bond Lengths and Angles for **1·H<sub>2</sub>O**

**Table S4.** Anisotropic Thermal Parameters for **1·H<sub>2</sub>O**

**Table S5.** Hydrogen Atom Coordinates for **1·H<sub>2</sub>O**

**Table S6.** Summary of Crystal Data and Details of Intensity Collection for  
 $[\text{Os}_4(\mu\text{-H})(\mu\text{-OD})(\mu\text{-CO})(\text{CO})_{12}]$  (**2**)

**Table S7.** Atomic Coordinates for **2**

**Table S8.** Bond Lengths and Angles for **2**

**Table S9.** Anisotropic Thermal Parameters for **2**

**Table S10.** Hydrogen Atom Coordinates for **2**

**Figures**

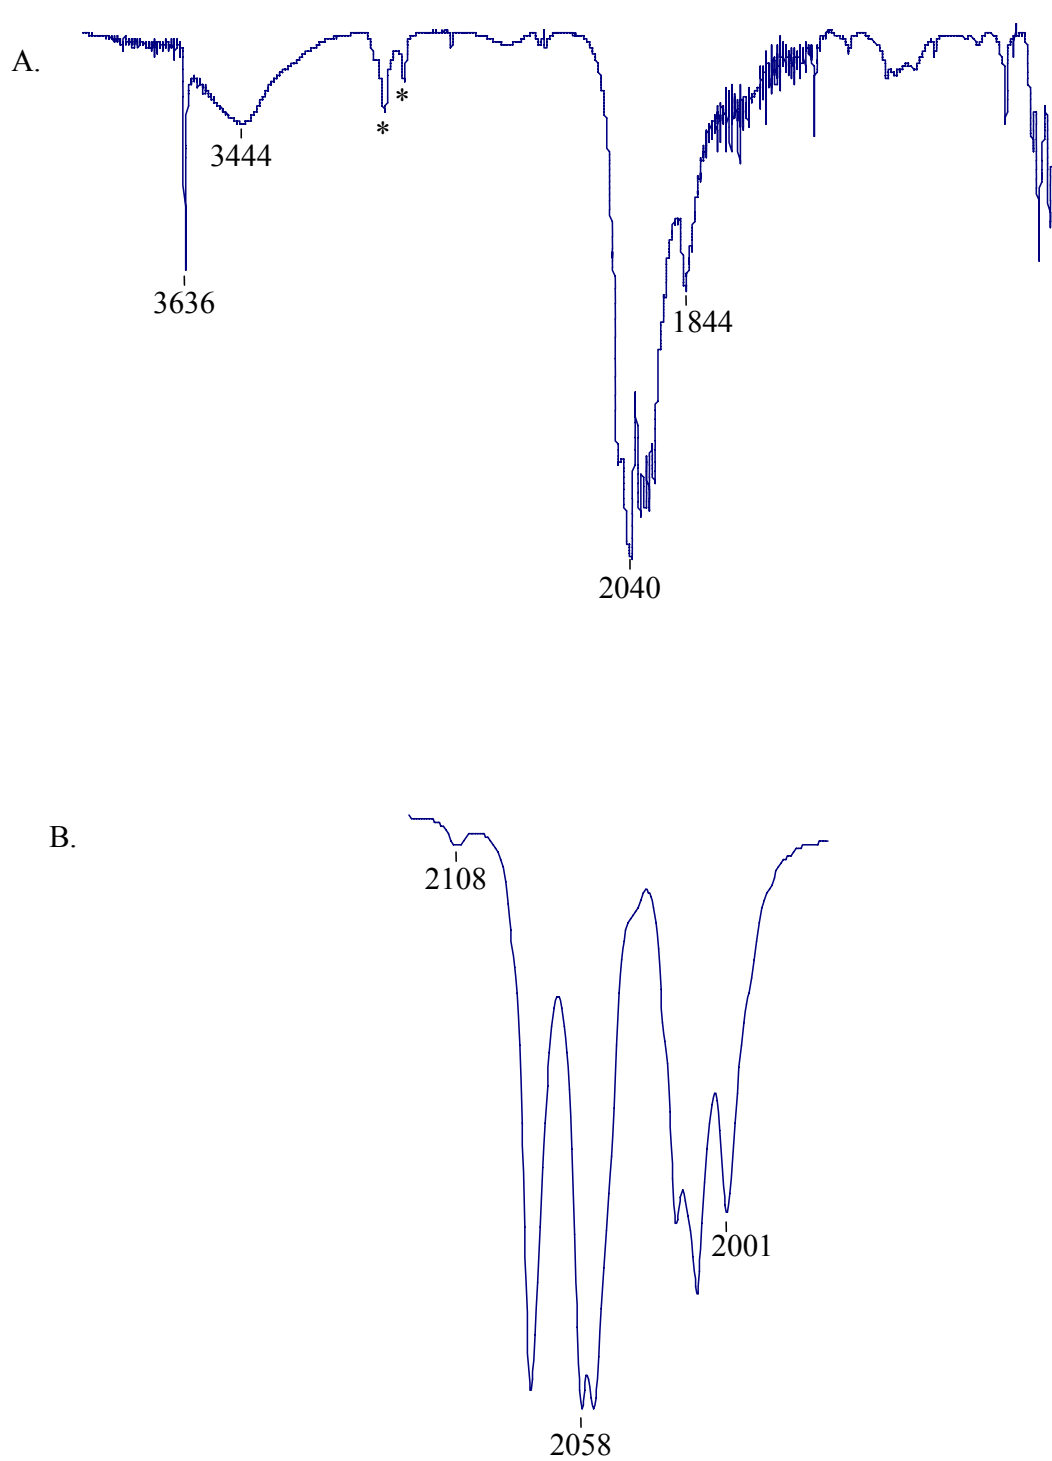

Figure S1.

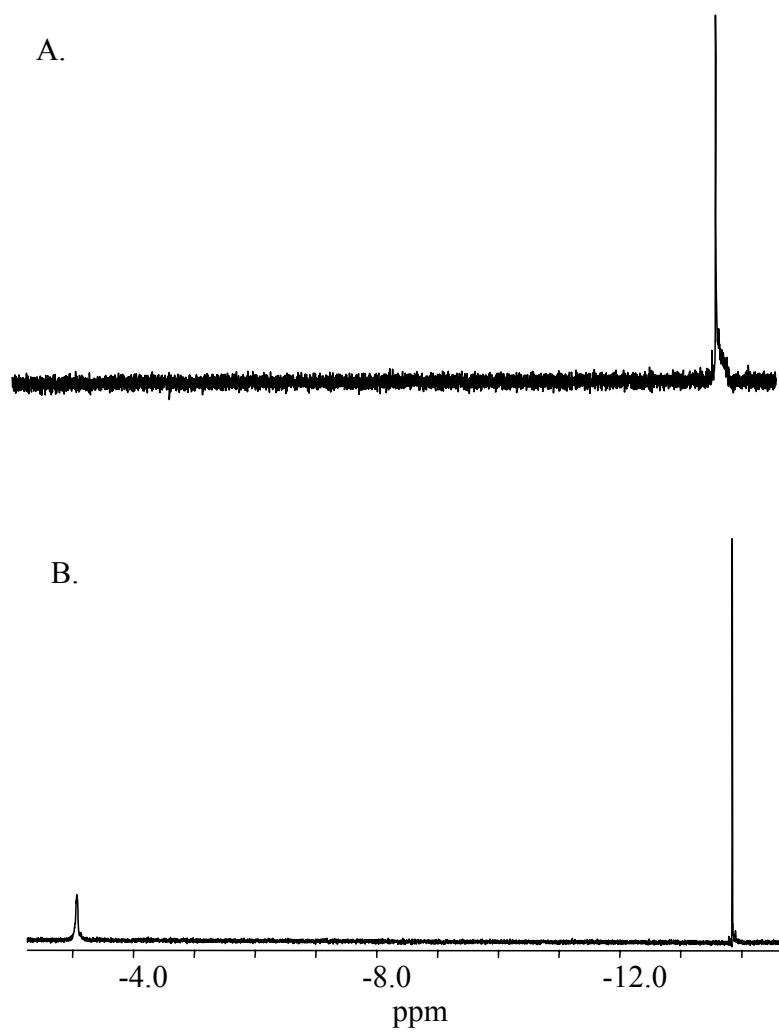

Figure S2.

**Tables**

**Table S1.** Summary of Crystal Data and Details of Intensity Collection for  
 $[\text{Os}_4(\mu\text{-H})(\mu\text{-OH})(\mu\text{-CO})(\text{CO})_{12}\cdot\text{H}_2\text{O}] (\mathbf{1}\cdot\mathbf{H}_2\mathbf{O})$

|                                   |                                                                                                                               |
|-----------------------------------|-------------------------------------------------------------------------------------------------------------------------------|
| Identification code               | rp013 ( <b>1.H<sub>2</sub>O</b> )                                                                                             |
| Empirical formula                 | C13 H4 O15 Os4                                                                                                                |
| Formula weight                    | 1160.96                                                                                                                       |
| Temperature                       | 203(2) K                                                                                                                      |
| Wavelength                        | 0.71073 Å                                                                                                                     |
| Crystal system, space group       | Monoclinic, C2/c                                                                                                              |
| Unit cell dimensions              | a = 29.882(2) Å      alpha = 90 deg.<br>b = 9.4147(7) Å      beta = 105.2270(10) deg.<br>c = 15.2741(12) Å    gamma = 90 deg. |
| Volume                            | 4146.3(6) Å <sup>3</sup>                                                                                                      |
| Z, Calculated density             | 8, 3.720 Mg/m <sup>3</sup>                                                                                                    |
| Absorption coefficient            | 24.512 mm <sup>-1</sup>                                                                                                       |
| F(000)                            | 4048                                                                                                                          |
| Crystal size                      | 0.1 x 0.1 x 0.1 mm                                                                                                            |
| Theta range for data collection   | 1.41 to 28.76 deg.                                                                                                            |
| Limiting indices                  | -38<=h<=37, 0<=k<=12, 0<=l<=20                                                                                                |
| Reflections collected / unique    | 4932 / 4932 [R(int) = 0.0000]                                                                                                 |
| Completeness to theta = 28.76     | 91.4 %                                                                                                                        |
| Absorption correction             | Semi-empirical from equivalents                                                                                               |
| Max. and min. transmission        | 0.928075 and 0.735427                                                                                                         |
| Refinement method                 | Full-matrix least-squares on F <sup>2</sup>                                                                                   |
| Data / restraints / parameters    | 4932 / 1 / 292                                                                                                                |
| Goodness-of-fit on F <sup>2</sup> | 1.034                                                                                                                         |
| Final R indices [I>2sigma(I)]     | R1 = 0.0286, wR2 = 0.0633                                                                                                     |
| R indices (all data)              | R1 = 0.0358, wR2 = 0.0644                                                                                                     |
| Largest diff. peak and hole       | 2.231 and -1.711 e.Å <sup>-3</sup>                                                                                            |

**Table S2.** Atomic coordinates ( $\times 10^4$ ) and equivalent isotropic displacement parameters ( $\text{\AA}^2 \times 10^3$ ) for **1.H<sub>2</sub>O** U(eq) is defined as one third of the trace of the orthogonalized Uij tensor.

|       | x       | y        | z        | U(eq) |
|-------|---------|----------|----------|-------|
| Os(1) | 687(1)  | -3140(1) | 10475(1) | 17(1) |
| Os(2) | 1668(1) | -2516(1) | 10527(1) | 16(1) |
| Os(3) | 1387(1) | -2923(1) | 12131(1) | 15(1) |
| Os(4) | 1322(1) | -168(1)  | 11324(1) | 17(1) |
| C(1)  | 264(3)  | -3103(8) | 9259(5)  | 24(2) |
| O(1)  | 25(2)   | -3184(8) | 8557(4)  | 45(2) |
| C(2)  | 754(3)  | -5101(9) | 10401(5) | 24(2) |
| O(2)  | 792(2)  | -6316(7) | 10342(4) | 39(2) |
| C(3)  | 234(3)  | -3358(9) | 11143(5) | 25(2) |
| O(3)  | -37(2)  | -3506(8) | 11532(4) | 41(2) |
| C(4)  | 1696(3) | -1404(8) | 9514(5)  | 22(2) |
| O(4)  | 1727(2) | -749(7)  | 8902(4)  | 40(2) |
| C(5)  | 1834(3) | -4243(9) | 10015(5) | 27(2) |
| O(5)  | 1940(3) | -5265(7) | 9720(4)  | 43(2) |
| C(6)  | 2291(3) | -2069(8) | 11154(5) | 20(2) |
| O(6)  | 2665(2) | -1782(7) | 11500(4) | 34(1) |
| C(7)  | 1660(3) | -4609(9) | 11723(5) | 22(2) |
| O(7)  | 1775(2) | -5761(6) | 11635(4) | 29(1) |
| C(8)  | 1937(3) | -2487(9) | 13088(5) | 22(2) |
| O(8)  | 2261(2) | -2255(7) | 13663(4) | 39(2) |
| C(9)  | 1107(3) | -4139(9) | 12833(5) | 25(2) |
| O(9)  | 935(2)  | -4856(7) | 13248(4) | 42(2) |
| C(10) | 1924(3) | 302(8)   | 12018(5) | 23(2) |
| O(10) | 2285(2) | 582(7)   | 12442(4) | 37(2) |
| C(11) | 1067(3) | 1360(9)  | 11896(5) | 26(2) |
| O(11) | 956(2)  | 2261(7)  | 12277(4) | 40(2) |
| C(12) | 1400(3) | 987(9)   | 10358(5) | 26(2) |
| O(12) | 1445(3) | 1755(7)  | 9802(4)  | 45(2) |
| C(13) | 1004(3) | -1418(9) | 12451(5) | 21(2) |
| O(13) | 739(2)  | -917(7)  | 12788(4) | 37(2) |
| O(14) | 651(2)  | -900(6)  | 10602(3) | 24(1) |
| O(15) | 164(2)  | 146(7)   | 9013(4)  | 44(2) |

**Table S3.** Bond lengths [Å] and angles [deg] for **1.H<sub>2</sub>O**

|                  |           |
|------------------|-----------|
| Os(1)-C(2)       | 1.864(9)  |
| Os(1)-C(3)       | 1.910(8)  |
| Os(1)-C(1)       | 1.953(8)  |
| Os(1)-O(14)      | 2.123(5)  |
| Os(1)-Os(3)      | 2.8343(4) |
| Os(1)-Os(2)      | 2.9701(5) |
| Os(2)-C(4)       | 1.887(7)  |
| Os(2)-C(6)       | 1.904(8)  |
| Os(2)-C(5)       | 1.924(9)  |
| Os(2)-Os(3)      | 2.8170(4) |
| Os(2)-Os(4)      | 2.8466(4) |
| Os(3)-C(9)       | 1.906(8)  |
| Os(3)-C(8)       | 1.935(8)  |
| Os(3)-C(7)       | 1.959(8)  |
| Os(3)-C(13)      | 1.963(8)  |
| Os(3)-Os(4)      | 2.8569(4) |
| Os(4)-C(10)      | 1.887(8)  |
| Os(4)-C(12)      | 1.895(8)  |
| Os(4)-C(11)      | 1.940(8)  |
| Os(4)-O(14)      | 2.132(5)  |
| Os(4)-C(13)      | 2.472(7)  |
| C(1)-O(1)        | 1.124(9)  |
| C(2)-O(2)        | 1.154(10) |
| C(3)-O(3)        | 1.132(9)  |
| C(4)-O(4)        | 1.144(9)  |
| C(5)-O(5)        | 1.141(10) |
| C(6)-O(6)        | 1.136(9)  |
| C(7)-O(7)        | 1.155(10) |
| C(8)-O(8)        | 1.144(10) |
| C(9)-O(9)        | 1.138(10) |
| C(10)-O(10)      | 1.133(10) |
| C(11)-O(11)      | 1.126(10) |
| C(12)-O(12)      | 1.150(10) |
| C(13)-O(13)      | 1.152(9)  |
| O(14)-O(15)      | 2.669(8)  |
| H(1)-Os(1)       | 1.75(4)   |
| H(1)-Os(2)       | 1.76(4)   |
| C(2)-Os(1)-C(3)  | 91.6(4)   |
| C(2)-Os(1)-C(1)  | 90.7(3)   |
| C(3)-Os(1)-C(1)  | 97.8(3)   |
| C(2)-Os(1)-O(14) | 176.7(3)  |
| C(3)-Os(1)-O(14) | 89.9(3)   |

Supplementary data (ESI) for *Dalton Transactions*  
This journal is © The Royal Society of Chemistry 2008

|                   |            |
|-------------------|------------|
| C(1)-Os(1)-O(14)  | 91.9(3)    |
| C(2)-Os(1)-Os(3)  | 93.4(2)    |
| C(3)-Os(1)-Os(3)  | 89.5(2)    |
| C(1)-Os(1)-Os(3)  | 171.5(2)   |
| O(14)-Os(1)-Os(3) | 83.70(14)  |
| C(2)-Os(1)-Os(2)  | 94.4(2)    |
| C(3)-Os(1)-Os(2)  | 147.2(2)   |
| C(1)-Os(1)-Os(2)  | 114.2(2)   |
| O(14)-Os(1)-Os(2) | 82.79(15)  |
| Os(3)-Os(1)-Os(2) | 58.011(10) |
| C(4)-Os(2)-C(6)   | 92.5(3)    |
| C(4)-Os(2)-C(5)   | 93.7(3)    |
| C(6)-Os(2)-C(5)   | 94.0(3)    |
| C(4)-Os(2)-Os(3)  | 151.1(2)   |
| C(6)-Os(2)-Os(3)  | 93.9(2)    |
| C(5)-Os(2)-Os(3)  | 114.0(2)   |
| C(4)-Os(2)-Os(4)  | 91.1(2)    |
| C(6)-Os(2)-Os(4)  | 91.7(2)    |
| C(5)-Os(2)-Os(4)  | 172.4(2)   |
| Os(3)-Os(2)-Os(4) | 60.582(10) |
| C(4)-Os(2)-Os(1)  | 110.0(2)   |
| C(6)-Os(2)-Os(1)  | 152.3(2)   |
| C(5)-Os(2)-Os(1)  | 100.4(2)   |
| Os(3)-Os(2)-Os(1) | 58.578(10) |
| Os(4)-Os(2)-Os(1) | 72.415(11) |
| C(9)-Os(3)-C(8)   | 96.5(3)    |
| C(9)-Os(3)-C(7)   | 88.5(3)    |
| C(8)-Os(3)-C(7)   | 94.0(3)    |
| C(9)-Os(3)-C(13)  | 85.6(3)    |
| C(8)-Os(3)-C(13)  | 95.4(3)    |
| C(7)-Os(3)-C(13)  | 169.4(3)   |
| C(9)-Os(3)-Os(2)  | 147.8(2)   |
| C(8)-Os(3)-Os(2)  | 103.9(2)   |
| C(7)-Os(3)-Os(2)  | 65.8(2)    |
| C(13)-Os(3)-Os(2) | 116.4(2)   |
| C(9)-Os(3)-Os(1)  | 97.4(2)    |
| C(8)-Os(3)-Os(1)  | 166.1(2)   |
| C(7)-Os(3)-Os(1)  | 86.0(2)    |
| C(13)-Os(3)-Os(1) | 86.1(2)    |
| Os(2)-Os(3)-Os(1) | 63.411(11) |
| C(9)-Os(3)-Os(4)  | 142.9(2)   |
| C(8)-Os(3)-Os(4)  | 94.7(2)    |
| C(7)-Os(3)-Os(4)  | 125.8(2)   |
| C(13)-Os(3)-Os(4) | 58.2(2)    |
| Os(2)-Os(3)-Os(4) | 60.222(10) |
| Os(1)-Os(3)-Os(4) | 74.312(11) |



Supplementary data (ESI) for *Dalton Transactions*  
This journal is © The Royal Society of Chemistry 2008

|                   |            |
|-------------------|------------|
| C(10)-Os(4)-C(12) | 90.5(3)    |
| C(10)-Os(4)-C(11) | 90.1(3)    |
| C(12)-Os(4)-C(11) | 93.9(3)    |
| C(10)-Os(4)-O(14) | 174.3(3)   |
| C(12)-Os(4)-O(14) | 94.2(3)    |
| C(11)-Os(4)-O(14) | 92.6(3)    |
| C(10)-Os(4)-C(13) | 101.8(3)   |
| C(12)-Os(4)-C(13) | 164.4(3)   |
| C(11)-Os(4)-C(13) | 76.7(3)    |
| O(14)-Os(4)-C(13) | 74.0(2)    |
| C(10)-Os(4)-Os(2) | 91.3(2)    |
| C(12)-Os(4)-Os(2) | 88.8(2)    |
| C(11)-Os(4)-Os(2) | 176.9(2)   |
| O(14)-Os(4)-Os(2) | 85.72(14)  |
| C(13)-Os(4)-Os(2) | 100.22(18) |
| C(10)-Os(4)-Os(3) | 91.3(2)    |
| C(12)-Os(4)-Os(3) | 148.0(2)   |
| C(11)-Os(4)-Os(3) | 118.0(2)   |
| O(14)-Os(4)-Os(3) | 82.97(14)  |
| C(13)-Os(4)-Os(3) | 42.47(18)  |
| Os(2)-Os(4)-Os(3) | 59.196(11) |
| O(1)-C(1)-Os(1)   | 175.1(8)   |
| O(2)-C(2)-Os(1)   | 179.0(8)   |
| O(3)-C(3)-Os(1)   | 178.9(8)   |
| O(4)-C(4)-Os(2)   | 177.6(7)   |
| O(5)-C(5)-Os(2)   | 178.8(8)   |
| O(6)-C(6)-Os(2)   | 177.6(7)   |
| O(7)-C(7)-Os(3)   | 163.3(6)   |
| O(8)-C(8)-Os(3)   | 178.5(7)   |
| O(9)-C(9)-Os(3)   | 179.1(8)   |
| O(10)-C(10)-Os(4) | 179.5(8)   |
| O(11)-C(11)-Os(4) | 174.0(8)   |
| O(12)-C(12)-Os(4) | 176.0(7)   |
| O(13)-C(13)-Os(3) | 157.0(7)   |
| O(13)-C(13)-Os(4) | 123.5(6)   |
| Os(3)-C(13)-Os(4) | 79.3(2)    |
| Os(1)-O(14)-Os(4) | 107.8(2)   |
| Os(1)-O(14)-O(15) | 108.2(3)   |
| Os(4)-O(14)-O(15) | 124.4(3)   |
| Os(1)-H(1)-Os(2)  | 115(4)     |

---

**Table S4.** Anisotropic displacement parameters ( $\text{\AA}^2 \times 10^3$ ) for **1.H<sub>2</sub>O**.

The anisotropic displacement factor exponent takes the form:

$$-2 \pi^2 [ h^2 a^{*2} U_{11} + \dots + 2 h k a^* b^* U_{12} ]$$

|       | U11   | U22   | U33   | U23    | U13    | U12    |
|-------|-------|-------|-------|--------|--------|--------|
| Os(1) | 12(1) | 21(1) | 16(1) | 0(1)   | 0(1)   | 0(1)   |
| Os(2) | 15(1) | 20(1) | 16(1) | -1(1)  | 5(1)   | 1(1)   |
| Os(3) | 13(1) | 19(1) | 14(1) | 1(1)   | 2(1)   | 0(1)   |
| Os(4) | 15(1) | 16(1) | 19(1) | -1(1)  | 4(1)   | 1(1)   |
| C(1)  | 20(4) | 21(4) | 27(4) | 3(3)   | 2(3)   | 1(3)   |
| O(1)  | 43(4) | 59(5) | 25(3) | -4(3)  | -5(3)  | -2(4)  |
| C(2)  | 18(4) | 27(5) | 23(4) | 2(3)   | -3(3)  | 1(3)   |
| O(2)  | 34(4) | 32(4) | 45(4) | -3(3)  | 4(3)   | -1(3)  |
| C(3)  | 20(4) | 30(5) | 24(4) | -2(3)  | 5(3)   | -6(3)  |
| O(3)  | 33(4) | 51(4) | 41(4) | -5(3)  | 13(3)  | -12(3) |
| C(4)  | 26(4) | 20(4) | 20(3) | -1(3)  | 7(3)   | 3(3)   |
| O(4)  | 55(4) | 40(4) | 29(3) | 10(3)  | 19(3)  | 13(3)  |
| C(5)  | 19(4) | 37(5) | 25(4) | -2(3)  | 9(3)   | -5(4)  |
| O(5)  | 55(5) | 32(4) | 44(4) | -16(3) | 20(3)  | 2(3)   |
| C(6)  | 18(4) | 22(4) | 20(3) | 6(3)   | 5(3)   | -1(3)  |
| O(6)  | 18(3) | 40(4) | 41(3) | -6(3)  | 2(3)   | 2(3)   |
| C(7)  | 8(3)  | 35(5) | 22(3) | 6(3)   | 3(3)   | 0(3)   |
| O(7)  | 26(3) | 23(3) | 36(3) | 7(3)   | 4(3)   | 7(3)   |
| C(8)  | 20(4) | 28(4) | 19(3) | 2(3)   | 9(3)   | 1(3)   |
| O(8)  | 29(4) | 46(4) | 33(3) | 1(3)   | -10(3) | -6(3)  |
| C(9)  | 19(4) | 33(5) | 26(4) | -2(3)  | 10(3)  | 2(3)   |
| O(9)  | 48(4) | 41(4) | 46(4) | 14(3)  | 29(3)  | -5(3)  |
| C(10) | 22(4) | 18(4) | 29(4) | -7(3)  | 8(3)   | 0(3)   |
| O(10) | 16(3) | 39(4) | 51(4) | -10(3) | 1(3)   | -6(3)  |
| C(11) | 22(4) | 28(5) | 26(4) | 6(3)   | 5(3)   | 7(4)   |
| O(11) | 45(4) | 36(4) | 39(3) | -10(3) | 12(3)  | 11(3)  |
| C(12) | 25(4) | 23(4) | 29(4) | -2(3)  | 5(3)   | 3(3)   |
| O(12) | 71(5) | 33(4) | 42(4) | 8(3)   | 33(4)  | 5(4)   |
| C(13) | 16(4) | 28(4) | 20(3) | 0(3)   | 6(3)   | 2(3)   |
| O(13) | 38(4) | 41(4) | 40(3) | 2(3)   | 25(3)  | 3(3)   |
| O(14) | 24(3) | 19(3) | 25(3) | -1(2)  | 3(2)   | -1(2)  |
| O(15) | 41(4) | 57(5) | 36(3) | 19(3)  | 12(3)  | 17(3)  |

**Table S5.** Hydrogen coordinates ( $\times 10^4$ ) and isotropic displacement parameters ( $\text{\AA}^2 \times 10^3$ ) for **1.H<sub>2</sub>O**.

|      | x        | y         | z        | U(eq) |
|------|----------|-----------|----------|-------|
| H(1) | 1101(10) | -2870(80) | 9860(50) | 20    |

**Table S6.** Summary of Crystal Data and Details of Intensity Collection for [Os<sub>4</sub>(μ-H)(μ-OD)(μ-CO)(CO)<sub>12</sub>] (**2**)

|                                   |                                                         |                                                     |
|-----------------------------------|---------------------------------------------------------|-----------------------------------------------------|
| Identification code               | 03110                                                   |                                                     |
| Empirical formula                 | C <sub>13</sub> H D O <sub>14</sub> Os <sub>4</sub>     |                                                     |
| Formula weight                    | 1142.95                                                 |                                                     |
| Temperature                       | 150(2) K                                                |                                                     |
| Wavelength                        | 0.71073 Å                                               |                                                     |
| Crystal system                    | Monoclinic                                              |                                                     |
| Space group                       | P2(1)/n                                                 |                                                     |
| Unit cell dimensions              | a = 9.2448(2) Å<br>b = 14.2439(3) Å<br>c = 15.2035(4) Å | alpha = 90°.<br>beta = 97.040(10)°.<br>gamma = 90°. |
| Volume                            | 1986.93(8) Å <sup>3</sup>                               |                                                     |
| Z, Calculated Density             | 4, 3.821 Mg/m <sup>3</sup>                              |                                                     |
| Absorption coefficient            | 25.568 mm <sup>-1</sup>                                 |                                                     |
| F(000)                            | 1984                                                    |                                                     |
| Crystal size                      | 0.28 x 0.25 x 0.13 mm <sup>3</sup>                      |                                                     |
| Theta range for data collection   | 2.64 to 25.35°.                                         |                                                     |
| Index ranges                      | -11 ≤ h ≤ 11, -16 ≤ k ≤ 17, -18 ≤ l ≤ 18                |                                                     |
| Reflections collected             | 24430                                                   |                                                     |
| Independent reflections           | 3632 [R(int) = 0.121]                                   |                                                     |
| Completeness to theta = 25.00°    | 99.9 %                                                  |                                                     |
| Absorption correction             | Integration                                             |                                                     |
| Max. and min. transmission        | 0.1423 and 0.0538                                       |                                                     |
| Refinement method                 | Full-matrix least-squares on F <sup>2</sup>             |                                                     |
| Data / restraints / parameters    | 3632 / 4 / 153                                          |                                                     |
| Goodness-of-fit on F <sup>2</sup> | 1.011                                                   |                                                     |
| Final R indices [I > 2σ(I)]       | R1 = 0.0448, wR2 = 0.1029                               |                                                     |
| R indices (all data)              | R1 = 0.0615, wR2 = 0.1090                               |                                                     |
| Extinction coefficient            | 0.00119(7)                                              |                                                     |
| Largest diff. peak and hole       | 3.062 and -3.355 e.Å <sup>-3</sup>                      |                                                     |

**Table S7.** Atomic coordinates (x 10<sup>4</sup>) and equivalent isotropic displacement parameters (Å<sup>2</sup> x 10<sup>3</sup>) for **2**. U(eq) is defined as one third of the trace of the orthogonalized U<sub>ij</sub> tensor.

|       | x        | y        | z        | U(eq) |
|-------|----------|----------|----------|-------|
| Os(1) | 7537(1)  | 8029(1)  | -997(1)  | 8(1)  |
| Os(2) | 7401(1)  | 8445(1)  | 891(1)   | 8(1)  |
| Os(3) | 7756(1)  | 6593(1)  | 300(1)   | 8(1)  |
| Os(4) | 4912(1)  | 7332(1)  | 278(1)   | 9(1)  |
| O(1)  | 6948(11) | 9607(8)  | -2356(7) | 23(3) |
| C(1)  | 7152(14) | 9051(10) | -1835(9) | 10(3) |

Supplementary data (ESI) for *Dalton Transactions*  
This journal is © The Royal Society of Chemistry 2008

|       |           |          |           |       |
|-------|-----------|----------|-----------|-------|
| O(2)  | 10778(12) | 8360(8)  | -797(7)   | 25(3) |
| C(2)  | 9565(15)  | 8225(10) | -886(10)  | 14(3) |
| O(3)  | 7792(12)  | 6616(8)  | -2453(8)  | 30(3) |
| C(3)  | 7677(16)  | 7140(11) | -1899(10) | 18(3) |
| O(4)  | 5776(11)  | 10252(7) | 1179(7)   | 21(3) |
| C(4)  | 6375(17)  | 9576(12) | 1057(10)  | 21(4) |
| O(5)  | 10239(12) | 9505(8)  | 1271(8)   | 32(3) |
| C(5)  | 9208(15)  | 9104(11) | 1139(10)  | 16(3) |
| O(6)  | 7392(12)  | 7741(8)  | 2769(7)   | 30(3) |
| C(6)  | 7409(15)  | 8007(10) | 2076(9)   | 10(3) |
| O(7)  | 10751(12) | 7266(8)  | 1130(7)   | 28(3) |
| C(7)  | 9576(15)  | 7130(10) | 848(9)    | 12(3) |
| O(8)  | 7729(12)  | 5279(9)  | 1904(8)   | 32(3) |
| C(8)  | 7703(15)  | 5782(10) | 1323(10)  | 13(3) |
| O(9)  | 9297(10)  | 5298(7)  | -892(7)   | 19(2) |
| C(9)  | 8777(16)  | 5783(11) | -423(10)  | 20(4) |
| O(10) | 4706(12)  | 6504(8)  | 2092(7)   | 26(3) |
| C(10) | 4793(14)  | 6828(10) | 1396(9)   | 7(3)  |
| O(11) | 2169(11)  | 6228(8)  | -420(7)   | 21(3) |
| C(11) | 3228(15)  | 6640(10) | -189(10)  | 11(3) |
| O(12) | 3164(11)  | 9069(8)  | 658(7)    | 25(3) |
| C(12) | 3865(16)  | 8423(11) | 522(10)   | 20(4) |
| O(13) | 5365(11)  | 5475(8)  | -851(7)   | 23(3) |
| C(13) | 5975(13)  | 6017(10) | -349(8)   | 6(3)  |
| O(14) | 5278(10)  | 7761(7)  | -1006(6)  | 13(2) |

**Table S8.** Bond lengths [Å] and angles [deg] for **2**.

|             |           |
|-------------|-----------|
| Os(1)-C(2)  | 1.882(14) |
| Os(1)-C(3)  | 1.883(16) |
| Os(1)-C(1)  | 1.938(14) |
| Os(1)-O(14) | 2.122(9)  |
| Os(1)-Os(3) | 2.8309(8) |
| Os(1)-Os(2) | 2.9482(8) |
| Os(2)-C(4)  | 1.903(16) |
| Os(2)-C(6)  | 1.907(14) |
| Os(2)-C(5)  | 1.913(15) |
| Os(2)-Os(3) | 2.8188(8) |
| Os(2)-Os(4) | 2.8547(8) |
| Os(3)-C(9)  | 1.919(15) |
| Os(3)-C(7)  | 1.941(15) |
| Os(3)-C(8)  | 1.942(15) |
| Os(3)-C(13) | 1.990(13) |
| Os(3)-Os(4) | 2.8288(7) |
| Os(4)-C(10) | 1.861(13) |

Supplementary data (ESI) for *Dalton Transactions*  
This journal is © The Royal Society of Chemistry 2008

|                   |            |
|-------------------|------------|
| Os(4)-C(12)       | 1.890(16)  |
| Os(4)-C(11)       | 1.905(14)  |
| Os(4)-O(14)       | 2.112(10)  |
| Os(4)-C(13)       | 2.370(13)  |
| O(1)-C(1)         | 1.119(16)  |
| O(2)-C(2)         | 1.130(17)  |
| O(3)-C(3)         | 1.140(18)  |
| O(4)-C(4)         | 1.137(18)  |
| O(5)-C(5)         | 1.108(17)  |
| O(6)-C(6)         | 1.121(16)  |
| O(7)-C(7)         | 1.134(17)  |
| O(8)-C(8)         | 1.135(17)  |
| O(9)-C(9)         | 1.141(17)  |
| O(10)-C(10)       | 1.165(17)  |
| O(11)-C(11)       | 1.158(17)  |
| O(12)-C(12)       | 1.159(17)  |
| O(13)-C(13)       | 1.179(16)  |
|                   |            |
| C(2)-Os(1)-C(3)   | 90.5(6)    |
| C(2)-Os(1)-C(1)   | 92.7(6)    |
| C(3)-Os(1)-C(1)   | 92.8(6)    |
| C(2)-Os(1)-O(14)  | 174.9(5)   |
| C(3)-Os(1)-O(14)  | 91.7(5)    |
| C(1)-Os(1)-O(14)  | 91.7(5)    |
| C(2)-Os(1)-Os(3)  | 93.4(5)    |
| C(3)-Os(1)-Os(3)  | 90.9(5)    |
| C(1)-Os(1)-Os(3)  | 172.8(4)   |
| O(14)-Os(1)-Os(3) | 82.0(3)    |
| C(2)-Os(1)-Os(2)  | 92.5(4)    |
| C(3)-Os(1)-Os(2)  | 149.2(5)   |
| C(1)-Os(1)-Os(2)  | 117.6(4)   |
| O(14)-Os(1)-Os(2) | 83.3(3)    |
| Os(3)-Os(1)-Os(2) | 58.344(19) |
| C(4)-Os(2)-C(6)   | 95.5(6)    |
| C(4)-Os(2)-C(5)   | 89.7(6)    |
| C(6)-Os(2)-C(5)   | 94.1(6)    |
| C(4)-Os(2)-Os(3)  | 156.1(5)   |
| C(6)-Os(2)-Os(3)  | 90.4(4)    |
| C(5)-Os(2)-Os(3)  | 112.9(5)   |
| C(4)-Os(2)-Os(4)  | 96.8(5)    |
| C(6)-Os(2)-Os(4)  | 92.1(4)    |
| C(5)-Os(2)-Os(4)  | 170.5(4)   |
| Os(3)-Os(2)-Os(4) | 59.811(19) |
| C(4)-Os(2)-Os(1)  | 112.4(5)   |
| C(6)-Os(2)-Os(1)  | 149.2(4)   |
| C(5)-Os(2)-Os(1)  | 98.6(4)    |

Supplementary data (ESI) for *Dalton Transactions*  
This journal is © The Royal Society of Chemistry 2008

|                   |            |
|-------------------|------------|
| Os(3)-Os(2)-Os(1) | 58.746(19) |
| Os(4)-Os(2)-Os(1) | 72.52(2)   |
| C(9)-Os(3)-C(7)   | 91.2(6)    |
| C(9)-Os(3)-C(8)   | 99.4(6)    |
| C(7)-Os(3)-C(8)   | 89.8(6)    |
| C(9)-Os(3)-C(13)  | 84.4(6)    |
| C(7)-Os(3)-C(13)  | 175.2(5)   |
| C(8)-Os(3)-C(13)  | 92.9(6)    |
| C(9)-Os(3)-Os(2)  | 146.1(5)   |
| C(7)-Os(3)-Os(2)  | 67.9(4)    |
| C(8)-Os(3)-Os(2)  | 106.6(4)   |
| C(13)-Os(3)-Os(2) | 115.0(4)   |
| C(9)-Os(3)-Os(4)  | 137.6(5)   |
| C(7)-Os(3)-Os(4)  | 127.9(4)   |
| C(8)-Os(3)-Os(4)  | 96.7(4)    |
| C(13)-Os(3)-Os(4) | 55.7(4)    |
| Os(2)-Os(3)-Os(4) | 60.724(19) |
| C(9)-Os(3)-Os(1)  | 91.9(5)    |
| C(7)-Os(3)-Os(1)  | 89.9(4)    |
| C(8)-Os(3)-Os(1)  | 168.7(4)   |
| C(13)-Os(3)-Os(1) | 88.2(4)    |
| Os(2)-Os(3)-Os(1) | 62.91(2)   |
| Os(4)-Os(3)-Os(1) | 74.68(2)   |
| C(10)-Os(4)-C(12) | 92.8(6)    |
| C(10)-Os(4)-C(11) | 90.2(6)    |
| C(12)-Os(4)-C(11) | 94.8(6)    |
| C(10)-Os(4)-O(14) | 171.9(5)   |
| C(12)-Os(4)-O(14) | 95.0(5)    |
| C(11)-Os(4)-O(14) | 91.2(5)    |
| C(10)-Os(4)-C(13) | 97.8(5)    |
| C(12)-Os(4)-C(13) | 167.4(6)   |
| C(11)-Os(4)-C(13) | 78.5(5)    |
| O(14)-Os(4)-C(13) | 74.7(4)    |
| C(10)-Os(4)-Os(3) | 90.3(4)    |
| C(12)-Os(4)-Os(3) | 143.2(5)   |
| C(11)-Os(4)-Os(3) | 121.8(4)   |
| O(14)-Os(4)-Os(3) | 82.2(3)    |
| C(13)-Os(4)-Os(3) | 43.9(3)    |
| C(10)-Os(4)-Os(2) | 93.0(4)    |
| C(12)-Os(4)-Os(2) | 83.8(5)    |
| C(11)-Os(4)-Os(2) | 176.6(4)   |
| O(14)-Os(4)-Os(2) | 85.8(3)    |
| C(13)-Os(4)-Os(2) | 102.3(3)   |
| Os(3)-Os(4)-Os(2) | 59.465(19) |
| O(1)-C(1)-Os(1)   | 176.0(13)  |
| O(2)-C(2)-Os(1)   | 177.9(14)  |

|                   |           |
|-------------------|-----------|
| O(3)-C(3)-Os(1)   | 178.1(14) |
| O(4)-C(4)-Os(2)   | 178.2(14) |
| O(5)-C(5)-Os(2)   | 178.2(15) |
| O(6)-C(6)-Os(2)   | 178.8(14) |
| O(7)-C(7)-Os(3)   | 165.7(13) |
| O(8)-C(8)-Os(3)   | 176.3(13) |
| O(9)-C(9)-Os(3)   | 175.3(14) |
| O(10)-C(10)-Os(4) | 179.2(14) |
| O(11)-C(11)-Os(4) | 175.4(12) |
| O(12)-C(12)-Os(4) | 176.8(14) |
| O(13)-C(13)-Os(3) | 153.1(11) |
| O(13)-C(13)-Os(4) | 126.0(10) |
| Os(3)-C(13)-Os(4) | 80.4(5)   |
| Os(4)-O(14)-Os(1) | 108.4(4)  |

**Table S9.** Anisotropic displacement parameters ( $\text{\AA}^2 \times 10^3$ ) for **2**.

The anisotropic displacement factor exponent takes the form:

$$-2 \pi^2 [ h^2 a^{*2} U_{11} + \dots + 2 h k a^* b^* U_{12} ]$$

|       | U11  | U22   | U33   | U23   | U13  | U12  |
|-------|------|-------|-------|-------|------|------|
| Os(1) | 6(1) | 6(1)  | 12(1) | 0(1)  | 5(1) | 1(1) |
| Os(2) | 7(1) | 7(1)  | 13(1) | -2(1) | 4(1) | 0(1) |
| Os(3) | 6(1) | 5(1)  | 13(1) | 1(1)  | 5(1) | 2(1) |
| Os(4) | 4(1) | 10(1) | 15(1) | 1(1)  | 5(1) | 0(1) |

**Table S10.** Hydrogen coordinates ( $\times 10^4$ ) and isotropic displacement parameters ( $\text{\AA}^2 \times 10^3$ ) for **2**.

|       | x         | y        | z         | U(eq) |
|-------|-----------|----------|-----------|-------|
| H     | 6940(140) | 9000(90) | -260(30)  | 13    |
| H(14) | 5120(110) | 8350(20) | -1010(90) | 20    |
